# Supplementary material for: Effects of no-tillage sowing on soil properties and forage wheat and Italian ryegrass yields in winter fallow paddy fields
Source: PeerJ. 2021 Jan 28;9:e10573. doi: 10.7717/peerj.10573 (PMC7847706; doi:10.7717/peerj.10573)
Supplement: Supplemental Information 1 [file peerj-09-10573-s001.xlsx]

## Sheet: Soil properties
		Wheat														Italian ryegrass
		Year	Treatment	pH	Bulk density (g cm–3)	Organic matter (g kg–1)	Total nitrogen (g kg–1)	Urease (mg g–1 24 h–1)	Catalase (mg g–1 20 min–1)	Acid–phosphatase (mg g–1 24 h–1 )	Invertase (mg g–1 24 h–1)	Bacteria (lg cfu g–1 FM)	Actinomyces (lg cfu g–1 FM)	Fungi (lg cfu g–1 FM)		Year	Treatment	pH	Bulk density (g cm–3)	Organic matter (g kg–1)	Total nitrogen (g kg–1)	Urease (mg g–1 24 h–1)	Catalase (mg g–1 20 min–1)	Acid–phosphatase (mg g–1 24 h–1 )	Invertase (mg g–1 24 h–1)	Bacteria (lg cfu g–1 FM)	Actinomyces (lg cfu g–1 FM)	Fungi (lg cfu g–1 FM)
1	1	2016-2017	NB5-1	5.14	1.31483	22.8744	1.45585	0.363817	0.83	76.6958	6.23338	8.20952	6.60746	4.71		2016-2017	NB5-1	5.33	1.39764	24.1384	1.23932	0.33824	0.93	69.73	9	6.33	5.57229	5.06819
1	1		NB5-2	5.04	1.29741	23.6096	1.67944	0.353921	0.79764	72.7219	6.14863	8.16	5.79309	4.8293			NB5-2	5.32	1.5167	25.0645	1.35	0.337427	0.867	68.748	10.7675	6.28668	5.71012	5.06
1	1		NB5-3	5.08	1.31	24.7883	1.73385	0.344024	0.897	68.748	7.37751	8.72509	6.2	4.60746			NB5-3	5.33	1.43257	24.1839	1.453	0.339076	0.98838	70.735	7.25038	6.27646	5.58263	5.00115
1	2		NA1-1	5.53	1.39387	26.4861	1.75859	0.362167	1.09242	76.6958	7.19563	7.65321	5.95424	4.73239			NA1-1	5.38	1.45294	26.1642	1.59	0.291245	0.81498	56.8264	4.11462	6.26	5.33445	4.43527
1	2		NA1-2	5.33	1.43624	26.6968	1.56266	0.408349	1.42188	76.6958	8.79708	8.233	6.13033	5.233			NA1-2	5.48	1.46	25.57	1.64103	0.28	0.6489	57.82	5.28	6.233	5.84634	4.84
1	2		NA1-3	5.32	1.48686	26.5766	1.66793	0.309388	0.9337	76.7	7.98	7.94	6.04	4.91			NA1-3	5.44	1.4673	25.0033	1.60048	0.271453	0.50286	58.8133	6.44526	6.28141	5.95424	4.43136
1	3		CK1	5.58	1.34386	22.4437	0.868464	0.368	1	81.65	6.88	8.44667	6.95424	5.233			CK1	5.25	1.24	24.171	1.50184	0.281349	0.91902	76.6958	8.43689	7.12	5.68	5.69461
1	3		CK2	5.75	1.42298	23.6017	1.00707	0.393505	0.9537	80.6696	6.86901	8.42141	6.97543	5.25527			CK2	5.16	1.2363	23.8273	1.31598	0.28	1.0404	76.6958	8.4157	7.13033	5.74312	5.03342
1	3		CK3	5.35	1.38368	23.6237	1.11474	0.344024	1.09508	82.6866	6.91138	8.5563	7.58263	5.5977			CK3	5.38	1.29124	22.8062	1.33279	0.281349	1.10976	74.7388	7.64057	7.11033	5.79703	5.20952
2	1	2017-2018	NB5-1	5.11	1.33	25.3211	1.54014	0.532652	2.54	49.8299	6.76307	6.89	6.13	4.65321		2017-2018	NB5-1	5.02	1.21379	20.1177	1.77506	0.53	1.94208	52.2027	9.75052	5.95424	5.65321	4.79934
2	1		NB5-2	5.19	1.36199	23.9317	1.10391	0.529648	2.46228	56.9484	7.25	6.65321	5.90849	4.5563			NB5-2	4.97	1.11397	22.1638	1.42607	0.528147	2.09	53.97	12.3142	6.60746	5.73239	4.76716
2	1		NB5-3	5.17	1.30098	22.2948	1.31	0.556677	2.63568	49.8299	7.75889	7.13033	6.33445	5.13033			NB5-3	5.06	1.29548	22.5075	1.10208	0.523642	2.23686	55.762	7.67414	6.13033	5.25527	4.76716
2	2		NA1-1	5.1	1.38623	25.7751	1.37416	0.462	2.71	51.61	9.26	7.90849	5.95424	4.79934			NA1-1	5.2	1.21695	24.1517	1.23877	0.468082	2.47962	51.0163	10.6192	6.36746	5.76716	4.65321
2	2		NA1-2	5.23	1.39886	23.8228	1.49	0.483098	2.6877	54.5756	9.7717	6.13033	6.05115	4.84			NA1-2	5.15	1.18	23.78	1.25385	0.51	2.67	58.73	11.34	6.31	5.43	4.9
2	2		NA1-3	5.08	1.40232	21.6171	1.62611	0.442555	2.79706	48.6434	8.77589	7.01	5.90849	4.88366			NA1-3	5.09	1.13964	23.4078	1.268	0.567189	2.84376	66.4398	12.0811	6.30218	5.5563	5.31445
2	3		CK1	5.31	1.20941	20.6549	1.29423	0.643771	2.67036	68.8127	14.3482	8.15	6.15836	5.25527			CK1	5.21	1.13567	21.1458	1.17838	0.550671	2.73	56.9484	13.6	6.43136	5.69461	5.25527
2	3		CK2	5.25	1.24	22.7067	1.19449	0.72636	2.6877	66.43	16.8484	8.23528	6.24	5.06819			CK2	5.1	1.06193	22.1457	1.17	0.55	2.70504	60.5077	13.9657	6.5	5.95424	5.13033
2	3		CK3	5.27	1.25718	22.7866	1.17747	0.671	2.54898	64.067	15.6	8.06819	6.30643	5.15836			CK3	5.07	1.13485	20.7604	1.15303	0.555176	2.7744	60.5077	13.2888	6.5563	5.77934	5.33445

## Sheet: Soil property
Wheat											Italian ryegrass
Time	Treatment	Bulk density (g cm–3)	Soil water storage (mm)	Field moisture capacity (%)	Relative water content (%)	Total porosity (%)	Capillary moisture capacity (%)	Capillary porosity (%)	Non–capillary porosity (%)		Time	Treatment	Bulk density (g cm–3)	Soil water storage (mm)	Field moisture capacity (%)	Relative water content (%)	Total porosity (%)	Capillary moisture capacity (%)	Capillary porosity (%)	Non–capillary porosity (%)
1.24	NB5-1	1.2	148.554	39.11	64.72	52.2008	38.76	43.0943	9.10651		1.24	NB5-1	1.39631	160.14	33.72	62.7238	47.8757	33.6	37.6655	5.52
	NB5-2	1.19098	149.929	35.5597	70.8033	54.6508	38.4846	45.8342	8.81657			NB5-2	1.38806	171.776	30.4373	62.92	48.1479	31.1711	43.2675	4.8804
	NB5-3	1.22764	169.536	38.1897	72.3224	53.4409	36.7792	45.1518	8.28915			NB5-3	1.27175	148.503	37.0175	63.0896	51.9857	36.0484	45.8444	6.14138
	NA1-1	1.15298	167.82	52.11	82.75	55.9043	39.0724	45.0499	8.47859			NA1-1	1.09798	188.226	32.91	81.9512	57.719	48.2096	52.9334	4.78565
	NA1-2	1.25806	165.309	46.573	82.74	58.0364	35	51.3445	14.69			NA1-2	1.11469	180.81	34.5486	73.023	57.1679	42.6261	47.5148	3.99
	NA1-3	1.18	170.299	49.23	82.74	55.05	29.8013	43.6851	16.5122			NA1-3	1.18	173.355	31.271	81.1442	57.46	45.42	45.7018	3.16192
	CK1	1.13	144.938	34.47	65.1259	54.8322	39.1013	46.3536	10.8544			CK1	1.10379	96.4555	26.2527	66.5729	57.5275	34.7236	38.3276	19.1999
	CK2	1.15	123.65	23.4423	63.9	67.8032	31.7725	43.4712	7.69195			CK2	1.15696	106.081	28.3652	64.6493	55.7732	37.4505	43.3286	12.4446
	CK3	1.11734	106.289	28.5232	61.681	57.0805	36.3081	40.5683	1.89525			CK3	0.939397	101.192	26.4014	65.62	56.64	36.09	38.0424	15.81
2.25	NB5-1	1.18853	129.49	35.25	68.4783	54.7314	41.4089	49.2157	5.51568		2.25	NB5-1	1.1651	113.17	31.5674	62.56	55.5044	37.1011	43.2267	12.2776
	NB5-2	1.27287	131.676	34.1442	69.03	51.9488	35.2405	44.8564	7.09239			NB5-2	1.24384	112.192	28.0462	64.3212	52.9066	32.4681	40.385	12.5216
	NB5-3	1.11927	127.317	36.3272	70.24	57.0167	44.772	50.112	6.90462			NB5-3	1.06335	114.127	35.3065	60.7976	58.8617	43.1992	45.936	12.9256
	NA1-1	1.30016	179.823	35.0803	78.8522	51.0481	37.172	48.3296	14.54			NA1-1	1.34661	131.035	30.1868	75.81	49.5157	37.0337	41.3424	8.17323
	NA1-2	1.45661	166.67	24.0403	72.0768	45.8861	28.8232	41.9841	13.6091			NA1-2	1.38144	139.07	30.2662	76.9793	48.3663	37.4955	44.2656	4.10068
	NA1-3	1.47179	153.545	26.4913	78.7618	45.3854	28.3875	41.7804	15.494			NA1-3	1.37	147.077	26.2142	74.6253	44.3335	39.3128	43.4101	6.15
	CK1	1.13	101.77	26.5522	60	57.23	28.1204	40.548	2.71852			CK1	1.11937	84.8951	24.4313	48.18	57.0133	30.7012	41.4545	15.5588
	CK2	1.15685	111.53	27.9803	68.9113	55.7766	36.4501	42.1674	3.90203			CK2	1.13384	99.8367	26.78	45.3599	56.5361	32.0431	42.5138	14.0223
	CK3	1.06824	92.0249	23.27	54.3615	58.7004	40.4462	43.2064	3.605			CK3	1.10267	81.7886	29.1059	50.9679	57.5645	28.8695	43.349	14.2155
3.27	NB5-1	1.34	125.6	30.44	62.06	50.12	33.28	48.9407	5.76		3.27	NB5-1	1.21379	64.066	30.0411	35.1397	53.898	35.5123	43.1045	10.7935
	NB5-2	1.36199	122.632	28.6419	62.8721	49.0082	31.1696	42.4526	6.55556			NB5-2	1.11397	96.6083	28.83	47.6394	57.1914	40.5139	45.1314	12.06
	NB5-3	1.30098	128.539	32.2555	61.2621	51.0212	35.4028	46.0583	4.96298			NB5-3	1.29548	93.8582	26.2049	41.39	51.2027	33.7055	43.6647	7.53802
	NA1-1	1.38623	139.794	28.4319	54.18	48.2084	31.1095	43.1249	12.425			NA1-1	1.21695	116.164	39.4627	48.3775	53.7938	40.6428	49.4602	4.33361
	NA1-2	1.39886	108.474	29.4244	54.6294	47.7916	29.6709	41.5054	11.99			NA1-2	1.17	108.21	37.8	48.55	55.08	41.89	49.31	5.78
	NA1-3	1.43232	124.13	26.59	53.7246	47.6774	30.6653	43.0026	11.5211			NA1-3	1.13964	100.275	36.1069	48.7376	56.3445	43.1227	49.1444	7.2001
	CK1	1.20941	67.6818	29.0816	39.3661	54.0425	34.4113	41.6174	5.08349			CK1	1.13567	68.1911	30.9507	38.8003	56.4756	39.2915	44.6221	11.8535
	CK2	1.23	81.1265	28.3894	42.74	59.4431	39.5344	41.3424	6.28624			CK2	1.06193	75.0662	26.5202	37.32	58.9087	36.6008	38.8674	13.09
	CK3	1.25718	77.1033	25.7408	46.1304	52.4663	32.5691	40.9452	4.67473			CK3	1.13485	58.9224	28.9894	35.8204	56.5025	37.1836	42.198	14.3045

## Sheet: Soil water
Crop	Treatment	2018-12-02	2018-12-15	2018-12-28	2018-01-10	2018-01-24	2018-02-15	2018-03-17	2018-03-27
Wheat	NB5-1	18.3021	16.4816	15.9332	29.4566	22.2282	17.5624	15.8721	17.0269
	NB5-2	23.561	18.8199	15.7225	27.4763	21.3401	18.8827	15.945	17.1614
	NB5-3	20.5561	18.9549	19.0673	36.0947	20.606	19.0183	14.153	15.0819
	NA1-1	21.9019	24.0522	23.5352	38.7952	23.6126	23.2926	17.1098	20.5207
	NA1-2	22.3272	18.9927	18.9368	29.6216	24.7225	21.7344	18.4291	17.5173
	NA1-3	18.3124	23.3196	20.0891	28.307	23.414	23.3071	16.6478	15.4528
	CK1	16.2897	14.8108	13.8148	34.3729	18.8609	14.8431	12.3559	10.9952
	CK2	15.9721	16.1413	11.9212	32.57	19.6786	19.4252	14.577	20.1206
	CK3	20.5486	21.1271	17.5189	40.7486	21.7424	19.4043	16.2506	13.6125
Italian ryegrass	NB5-1	18.1942	16.3144	19.3059	25.086	19.5653	16.5775	11.7869	12.5868
	NB5-2	19.6686	18.9459	18.7401	28.5	20.3991	18.9886	17.8775	14.541
	NB5-3	19.386	17.3546	16.2091	36.5876	22.6961	20.3744	14.7476	14.1838
	NA1-1	24.5428	20.339	20.2983	35.1672	24.5496	24.5774	16.0597	15.5715
	NA1-2	23.3561	19.659	20.1488	31.8103	23.9945	23.53	14.97	16.71
	NA1-3	25.2909	18.5292	18.9376	27.5477	26.5625	22.5268	17.8747	17.8302
	CK1	17.7652	16.5221	15.8674	32.5168	18.5318	16.6469	12.4748	11.4432
	CK2	19.3927	17.8158	13.6218	38.1238	20.8608	21.1829	16.4881	13.549
	CK3	17.4275	14.9906	13.6091	37.7671	19.6417	14.2014	13.287	11.6729

## Sheet: Yield
Wheat								Italian ryegrass
Year	Treatment	Dry matter yield (t/ha)	Crude proteinyield (t/ha)	Population density(106 plant ha–1)	Plant height(cm)	Tiller number		Year	Treatment	Dry matter yield (t/ha)	Crude proteinyield (t/ha)	Population density(106 plant ha–1)	Plant height(cm)	Tiller number
2016-2017	NB5-1	11.7991	1.12856	6.0211	81.05	1.63		2016-2017	NB5-1	3.43	0.76	1.66667	35.97	8
	NB5-2	9.44668	0.978897	5.8622	75.97	1.5			NB5-2	3.31	0.7	1.83333	54.46	8
	NB5-3	11.1299	1.18287	5.91667	83.56	1.38			NB5-3	3.17	0.66	1.47222	40.32	6
	NA1-1	10.59	1.27	2.5889	83.61	1.29			NA1-1	7.33	0.95	1.44444	44.06	9.57
	NA1-2	11.5277	1.24899	2.6667	86.18	1.43			NA1-2	6.96	0.85	1.19444	56.3	25.8571
	NA1-3	9.63323	1.21941	2.7722	84.86	1.37			NA1-3	8.16	0.94	1.36111	50.29	11.2857
	CK1	9.67765	1.06664	3.769	90.86	1.5			CK1	7.76	0.9	1.44444	52.22	15
	CK2	11.9176	1.24237	3.54556	91.73	1.25			CK2	5.78	0.95	1.83333	52.37	14
	CK3	8.41321	0.861595	3.57433	84.8	1.38			CK3	6.32	0.87	1.63889	61.61	14.2857
2017-2018	NB5-1	8.4522	0.794349	3.56	86.0444	1.69		2017-2018	NB5-1	6.78	0.64	1.72	60.0571	7
	NB5-2	9.56646	0.782944	3.78	86	1.27			NB5-2	6.78	0.67	1.62	58.37	8
	NB5-3	9	0.79	3.76	87.2833	1.33			NB5-3	7.53	0.76	1.6	59.0091	9
	NA1-1	7.27885	0.5	1.24	80.86	1.08			NA1-1	8.8	0.75	1.36	58.2125	16.63
	NA1-2	7.9	0.48	1.18	80.83	1.5			NA1-2	8.9	0.76	1.24	59.2125	16.45
	NA1-3	8.53845	0.38	1.42	80.7917	1.91			NA1-3	8.97	0.76	1.12	60.2125	17.32
	CK1	9.02	1.08	1.72	79.2889	1.67			CK1	7.05	0.8	1.16	58	15.78
	CK2	9.12148	0.9	1.92	80.7308	1.79			CK2	8.7	0.7	1.24	55	15.69
	CK3	8.93417	0.92	1.96	80.02	1.72			CK3	8.44	0.91	1.46	53.46	15.42

## Sheet: Species diversity
Wheat								Italian ryegrass
Year	Treatment	Shannon's diversity index	Margalef index	Simpson index	Pielou index	Weeds dry matter yield (g m-2)		Year	Treatment	Shannon's diversity index	Margalef index	Simpson index	Pielou index	Weeds dry matter yield (g m-2)
2016-2017	NB5-1	1.34321	1.97123	0.277047	1.64303	10.2673		2016-2017	NB5-1	1.33864	1.9305	0.207084	0.802521	6.43333
	NB5-2	1.3	1.88	0.2	1.32	8.55			NB5-2	1.3	1.84	0.23	0.72	6.65
	NB5-3	1.45	1.83	0.21	1.72	7.99			NB5-3	1.28	1.9	0.23	0.74	7.04
	NA1-1	1.63883	3.89114	0.252978	1.79082	13.42			NA1-1	1.49793	3.31908	0.31581	0.747111	8.89333
	NA1-2	1.64	3.18	0.31	1.92	11.5			NA1-2	1.58	3.4	0.34	0.84	9.54
	NA1-3	1.52	3.04	0.26	1.89	10.78			NA1-3	1.55	2.97	0.28	0.81	9.83
	CK1	1.30016	1.70555	0.140679	0.79677	5.55033			CK1	0.939135	1.5735	0.204566	0.599083	5.04333
	CK2	1.18	1.77	0.18	0.98	5.03			CK2	0.99	1.68	0.23	0.82	3.97
	CK3	1.28	1.75	0.18	0.86	4.82			CK3	0.98	1.75	0.19	0.69	4.13

## Sheet: Meteorological data
Items	2016-2017					2017-2018
	Nov	Dec	Jan	Feb	Mar	Nov	Dec	Jan	Feb	Mar
Mean temperature (°C)	19.6	16.7	16.2	15.6	18.3	19.9	16.6	14.1	14.5	19.9
Rainfall (mm)	63.9	13.7	10	18.4	125	58.9	10.1	136	11.6	68.7

## Sheet: Winter fallow field soil
Measurements	2016-2017					2017-2018
	Sample 1	Sample 2	Sample 3	Sample 4	Sample 5	Sample 1	Sample 2	Sample 3	Sample 4	Sample 5
pH	5.44	5.71	5.97	5.67	5.47	5.24	4.81	5.44	5.26	5.24
Bulk density (g/cm3)	1.48	1.52	1.43	1.49	1.47	1.57	1.51	1.4	1.35	1.29
Organic matter (g/kg)	20.82	19.79	23.51	22.37	23.52	21.39	19.28	20.69	25.51	18.61
Total nitrogen (g/kg)	0.93	0.92	1.04	0.86	1.17	0.91	0.93	0.98	0.84	0.96
Urease (mg/g/24 h)	0.21	0.21	0.25	0.22	0.24	0.32	0.33	0.28	0.28	0.3
Catalase (mg/g/20 min)	0.72	0.81	0.79	0.68	0.84	1.87	1.85	1.77	1.84	1.82
Acid-phosphatase (mg/g/24 h)	58.73	51.95	55.57	54.71	53.02	43.76	50.12	51.64	44.81	43.15
Invertase (mg/g/24 h)	4.82	5.53	5.47	4.98	5.31	6.91	6.54	6.38	7.01	7.14
Bacteria (lg cfu/g FM)	6.57	6.01	5.67	6.33	6.37	6.25	6.08	5.94	6.15	6.12
Actinomyces (lg cfu/g FM)	5.58	4.84	5.56	5.62	5.17	5.56	5.14	4.97	5.28	5.48
Fungi (lg cfu/g FM)	4.82	4.74	4.26	4.28	4.42	4.73	4.65	4.48	4.33	4.51
